# Supplementary material for: NAC Pre-Administration Prevents Cardiac Mitochondrial Bioenergetics, Dynamics, Biogenesis, and Redox Alteration in Folic Acid-AKI-Induced Cardio-Renal Syndrome Type 3
Source: MDPI journal article supplement (doi:10.3390/antiox12081592), 2023-08-10

## Supplementary material

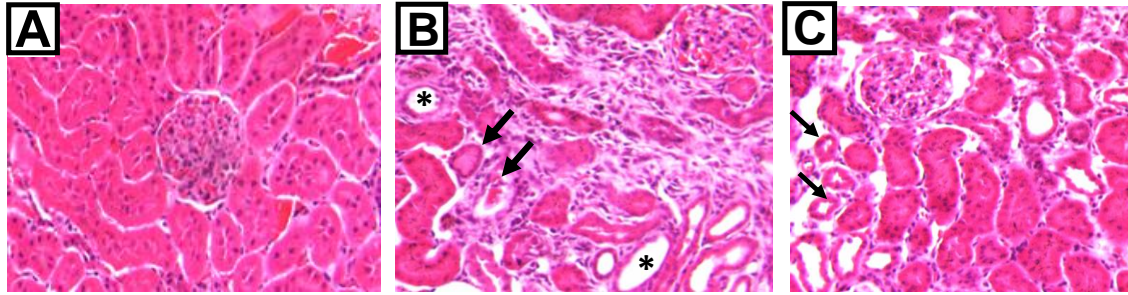

**Figure S1. Representative micrographs of kidney sections with hematoxylin and eosin staining:** (A) vehicle (normal histology). (B) FA group shows interstitial chronic inflammatory infiltrate surrounding proximal convoluted tubules, with swollen and detached epithelium (arrow) or hyaline cast in the lumen (arrow). Other tubules are coated with flat atrophic epithelium (asterisks). (C) NAC + FA group shows minimal interstitial inflammation and lesser tubular damage; some tubules show cuboidal cells with a hyperchromatic nucleus corresponding to the regenerative epithelium (arrows).

**Table S1. General and heart parameters.**

| Parameter              | Vehicle     | FA            | NAC+FA                     | NAC          |
|------------------------|-------------|---------------|----------------------------|--------------|
| Body weight (BW, g)    | 322 ± 37.3  | 259.2 ± 58.3* | 225.8 ± 17.5*              | 261.3 ± 3.9  |
| Heart weight (HW, g)   | 1.07 ± 0.16 | 1.04 ± 0.19   | 0.90 ± 0.09                | 0.97 ± 0.05  |
| HW/BW (g/Kg)           | 3.3 ± 0.26  | 4.07 ± 0.59*  | 4.02 ± 0.37*               | 3.72 ± 0.09  |
| Lung weight (LW, g)    | 2.2 ± 0.34  | 2.29 ± 0.45   | 1.5 ± 0.19*                | 1.9 ± 0.13   |
| LW/BW (g/Kg)           | 7.07 ± 1.4  | 9.1 ± 2.02*   | 6.8 ± 0.69                 | 7.4 ± 0.55   |
| Tibial length (TL, cm) | 5.12 ± 0.2  | 4.8 ± 0.29    | 4.8 ± 0.08*                | 5.2 ± 0.27   |
| HW/TL (g/cm)           | 0.2 ± 0.03  | 0.21 ± 0.03   | 0.18 ± 0.02                | 0.18 ± 0.005 |
| LW/TL (g/cm)           | 0.4 ± 0.07  | 0.48 ± 0.1    | 0.31 ± 0.03*, <sup>+</sup> | 0.36 ± 0.04  |

\*p≤0.05 vs. NAC. Data are mean ± SD n= 5-11. \*p≤0.05 vs Control, +p≤0.05 vs. FA. FA = Folic acid, NAC = N-acetyl-cysteine.

## Kidney

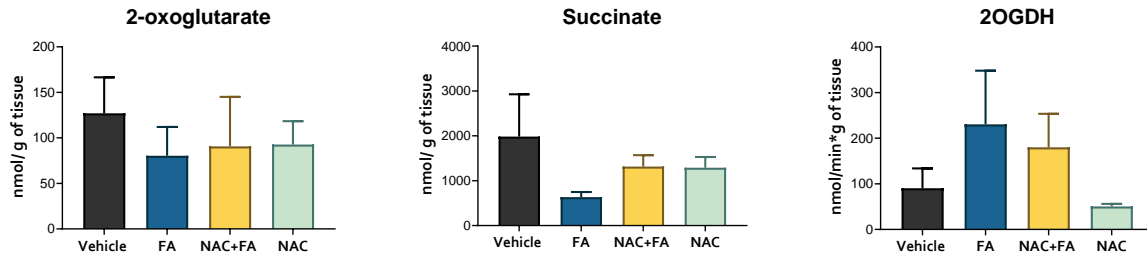

**Figure S2.** Levels of Krebs cycle intermediates 2-oxoglutarate and succinate and 2-oxoglutarate dehydrogenase (2-OGDH) activity in kidney homogenates. Data are mean  $\pm$  SEM,  $n = 3$ . FA = Folic acid, NAC = N-acetyl-cysteine.

### Heart mitochondrial H<sub>2</sub>O<sub>2</sub> production

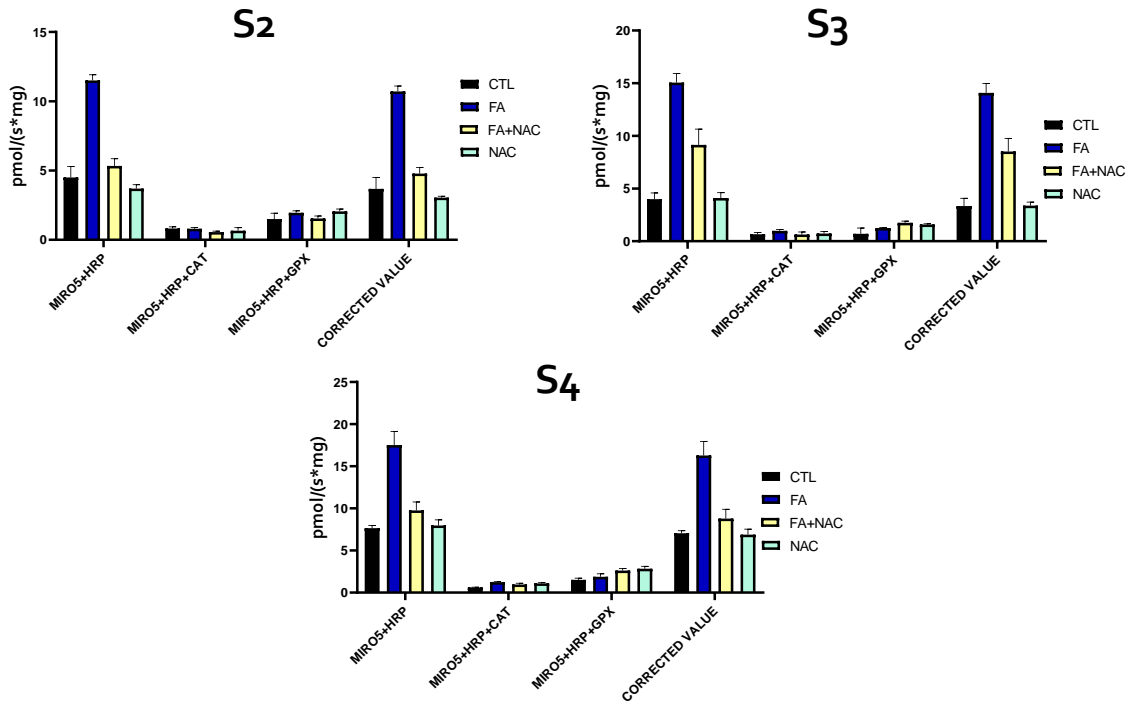

**Figure S3.** Evaluation of the rate of mitochondrial hydrogen peroxide (H<sub>2</sub>O<sub>2</sub>) production using Amplex red as a probe in the respiratory states S2= State 2, S3= State 3, S4= State 4. Data are mean  $\pm$  SEM, n = 3. FA = Folic Acid, NAC = N-acetylcysteine. Firstly, freshly isolated mitochondria were evaluated in Mitochondrial Respiration Buffer 05 plus Horseradish peroxidase 0.5 U/MI (MIR05+HRP). H<sub>2</sub>O<sub>2</sub> oxidizes Amplex red in the presence of HRP to produce the fluorescence product resorufin ( $\lambda$ =530–590 nm). The activity was expressed as nmol/min/mg of protein. To eliminate the verified specificity of the probe to H<sub>2</sub>O<sub>2</sub>, a second assay using the same condition in medium MIR05+HRP plus 280 U/mL of catalase (MIR05+HRP+CAT) was run for each group. As is observed in the figure, the H<sub>2</sub>O<sub>2</sub> scavenger, by catalase addition, drastically decreases the signal observed in all respiratory states and groups, proving that the observed signal is mainly attributed to this ROS. Similar results were observed in different assays where the base medium MIR05+HRP was supplemented with glutathione peroxidase and reduced glutathione (MIR05+HRP+GPx groups), reaffirming that the observed signal is mainly attributed to H<sub>2</sub>O<sub>2</sub>. The corrected value was determined as (MIR05+HRP) activity - (MIR05+HRP+CAT) activity and was reported in Fig. 7 of the results section.

## Mitochondrial fraction

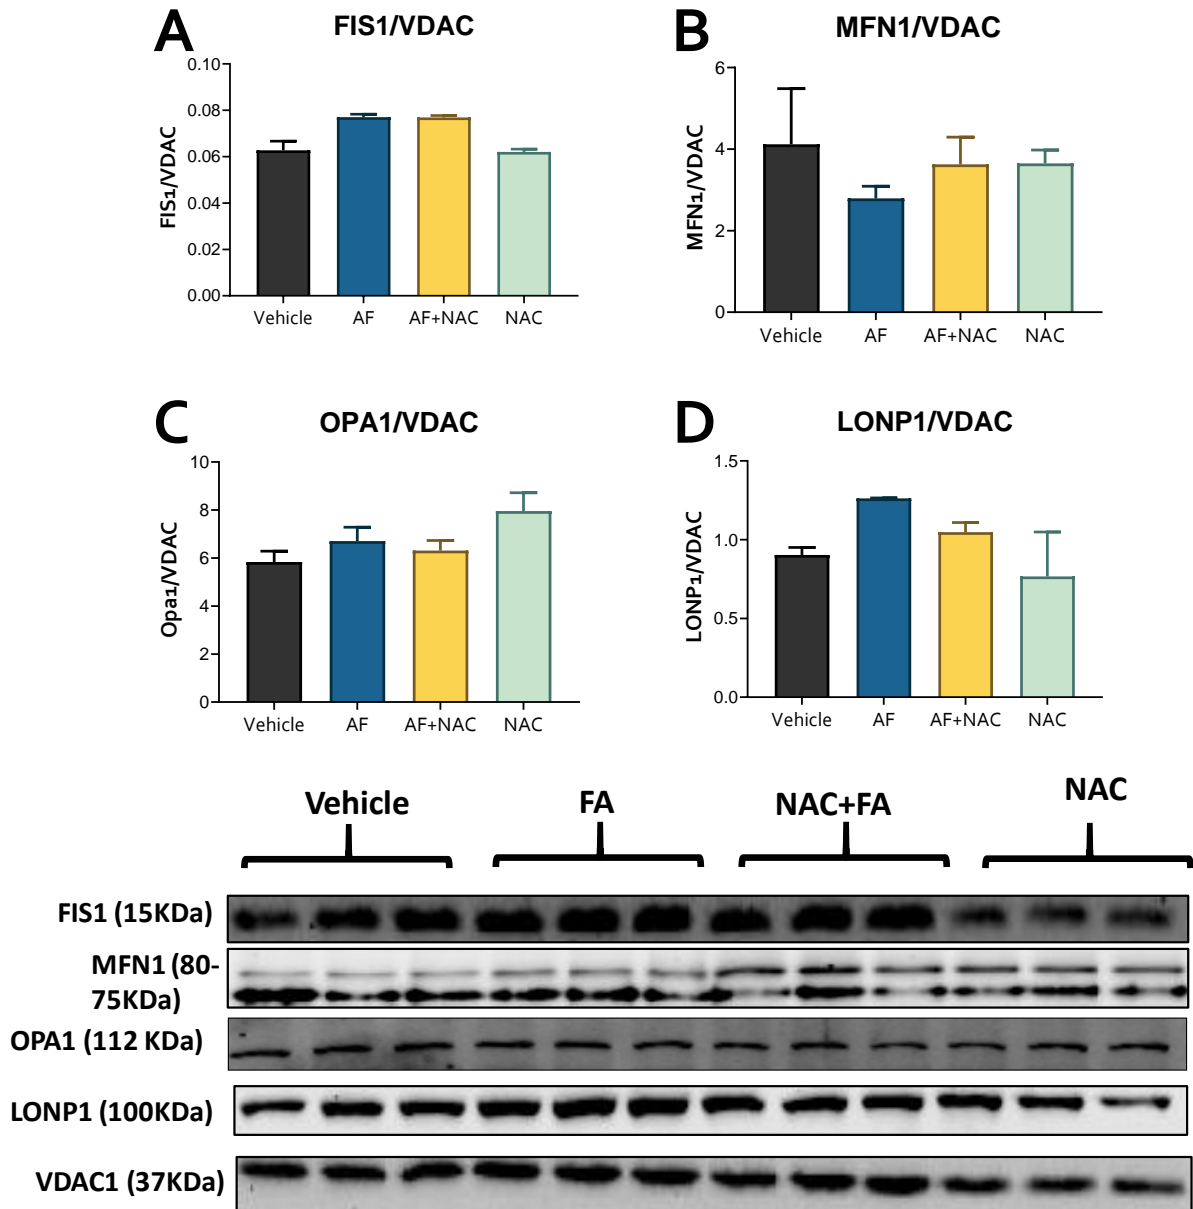

**Figure S4.** Western proteins in heart isolated mitochondrial and their densitometries of fission proteins (A) FIS1; fusion proteins: (B) MFN1 and (C) OPA1; as well as mitochondrial protease (D) LONP1. Data are mean  $\pm$  SEM,  $n = 3$ . FIS1= Mitochondrial fission 1 protein, VDAC= Voltage-dependent Anion selective channel, MFN1= Mitofusin 1, , LONP1= Lon Peptidase 1 mitochondrial, OPA1= Optic Atrophy 1. FA = Folic Acid, NAC = N-acetyl-cysteine

## Western blot membranes of Figure 1.

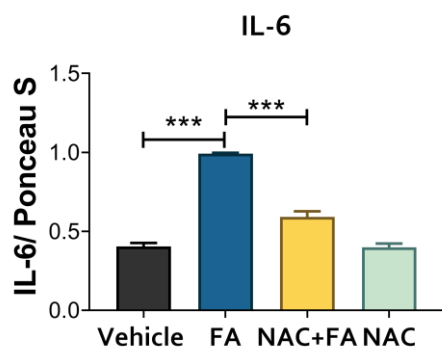

| Vehicle | FA    | NAC+FA | NAC   |
|---------|-------|--------|-------|
| 0.467   | 1     | 0.502  | 0.495 |
| 0.428   | 0.966 | 0.556  | 0.442 |
| 0.463   | 0.998 | 0.483  | 0.366 |
| 0.356   | 0.995 | 0.685  | 0.369 |
| 0.357   | 1     | 0.68   | 0.369 |
| 0.358   | 0.994 | 0.634  | 0.354 |

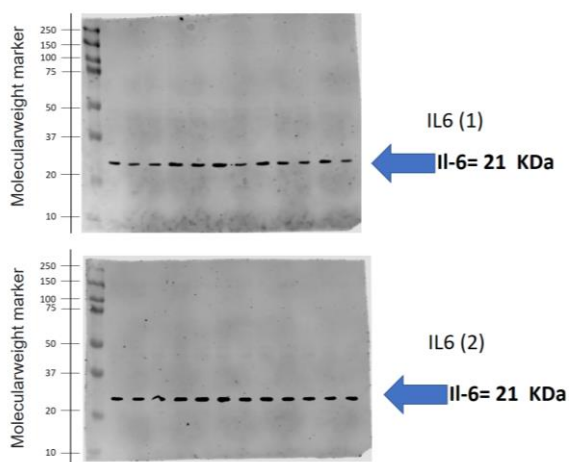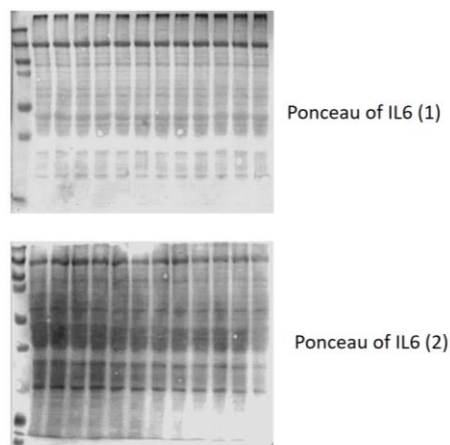

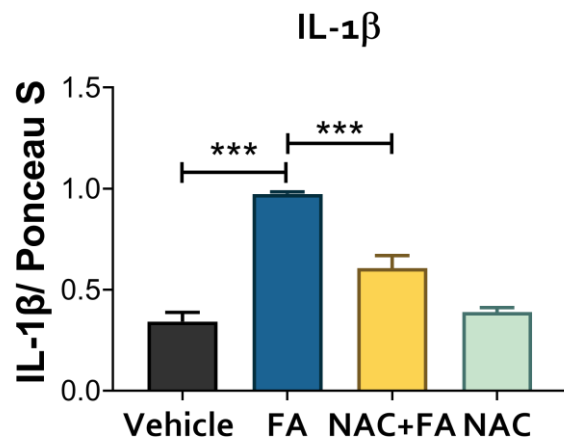

| Vehicle | FA   | NAC+FA | NAC  |
|---------|------|--------|------|
| 0.25    | 0.94 | 0.44   | 0.37 |
| 0.24    | 0.95 | 0.49   | 0.31 |
| 0.23    | 1    | 0.48   | 0.34 |
| 0.44    | 0.99 | 0.73   | 0.44 |
| 0.44    | 0.96 | 0.75   | 0.43 |
| 0.45    | 1    | 0.75   | 0.44 |

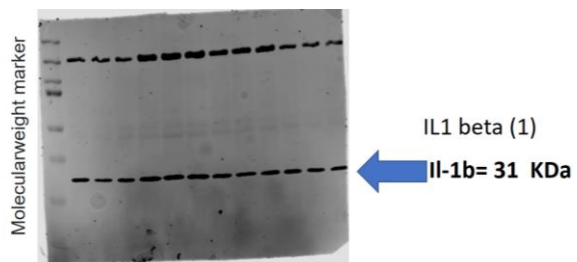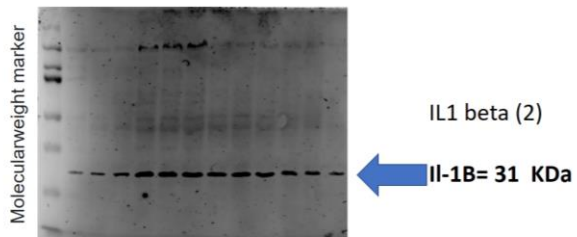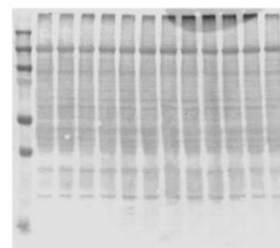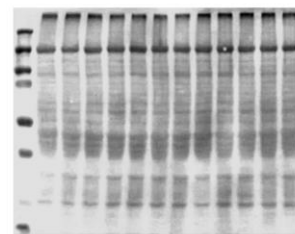

## Western blot membranes of Figure 2.

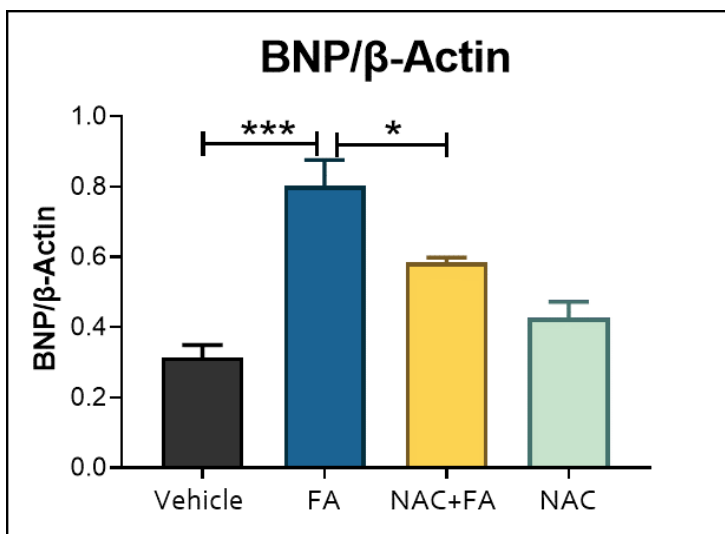

| Vehicle    | FA         | NAC+FA     | NAC        |
|------------|------------|------------|------------|
| 0.30022826 | 0.65301131 | 0.55928677 | 0.35596873 |
| 0.25948604 | 0.86397149 | 0.59080572 | 0.41116443 |
| 0.38072393 | 0.88862752 | 0.60434262 | 0.51242124 |

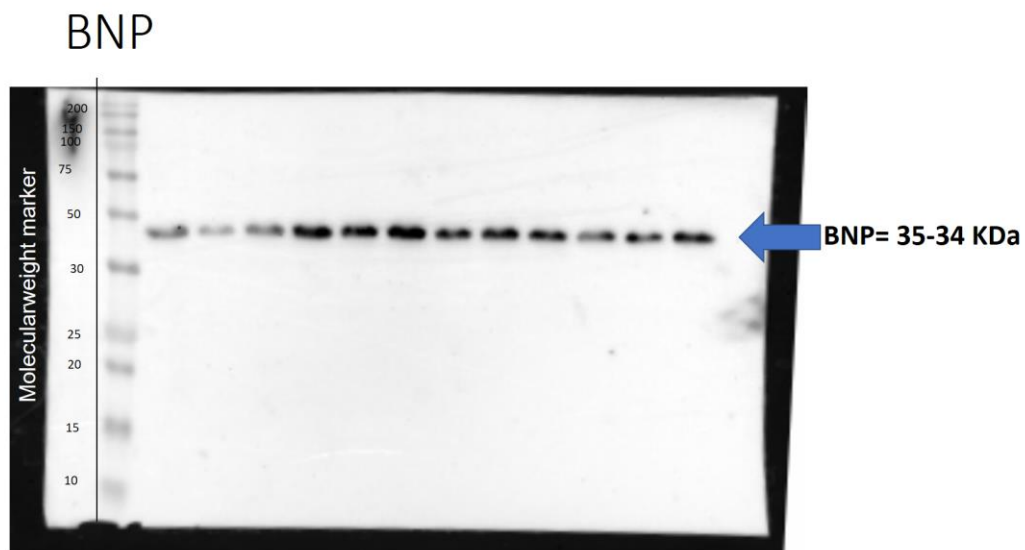

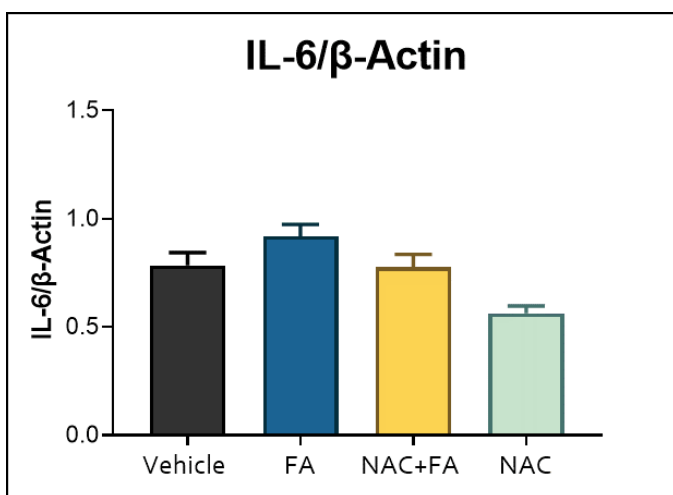

| Vehicle    | FA         | NAC+FA     | NAC        |
|------------|------------|------------|------------|
| 0.90502479 | 1.02760273 | 0.79765069 | 0.49364511 |
| 0.71897558 | 0.8554978  | 0.66333741 | 0.59936652 |
| 0.72651235 | 0.87514385 | 0.86692549 | 0.5947087  |

IL-6

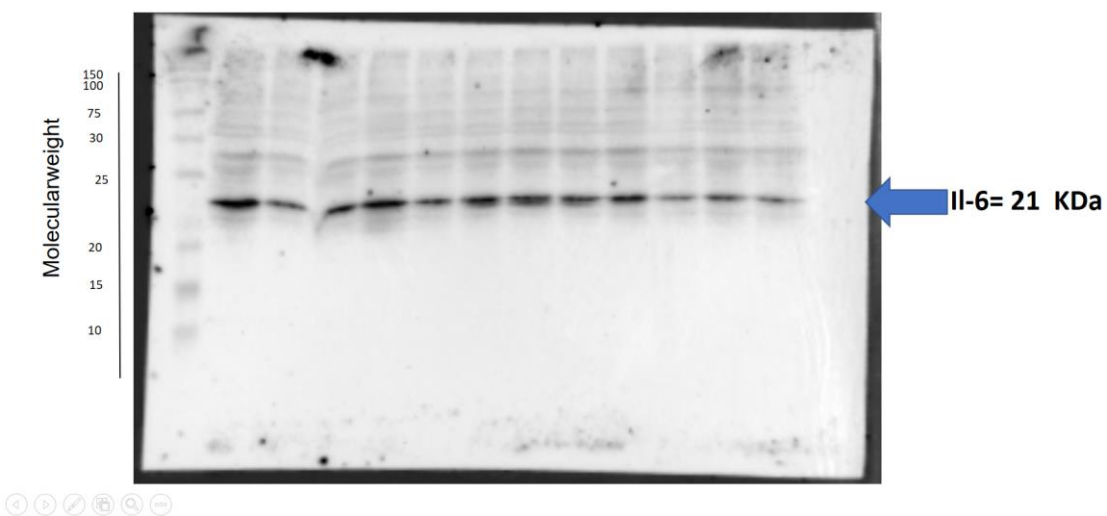



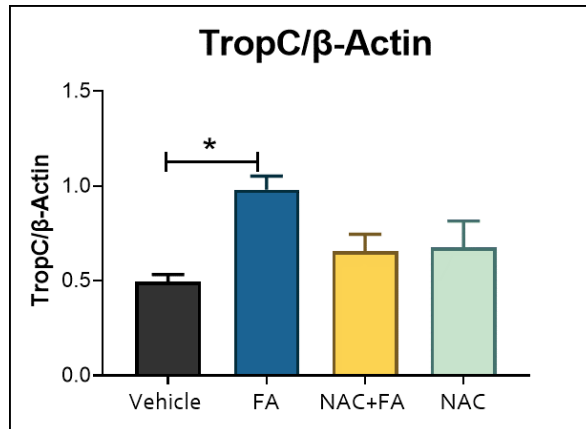

| Vehicle    | FA         | NAC+FA     | NAC        |
|------------|------------|------------|------------|
| 0.56303901 | 0.96069144 | 0.56370764 | 0.94998611 |
| 0.42640581 | 0.86728514 | 0.83751261 | 0.50026708 |
| 0.49155765 | 1.11400709 | 0.56246518 | 0.57844585 |

## Troponin C

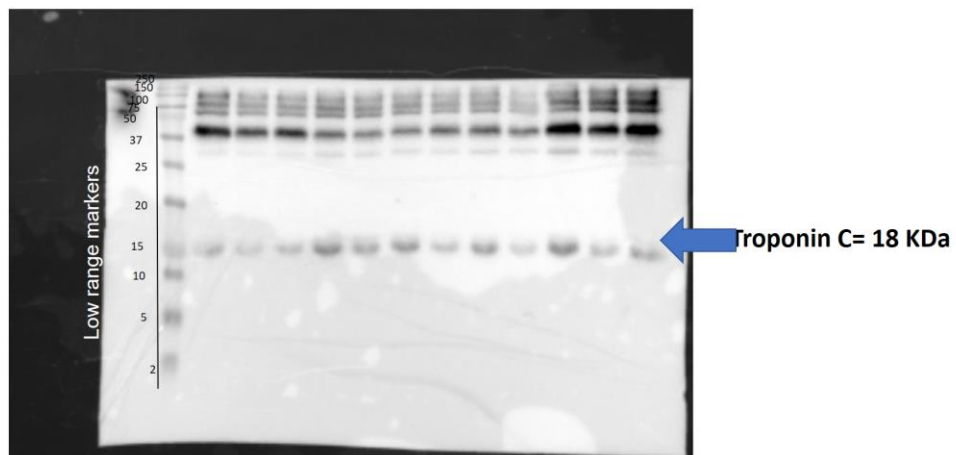

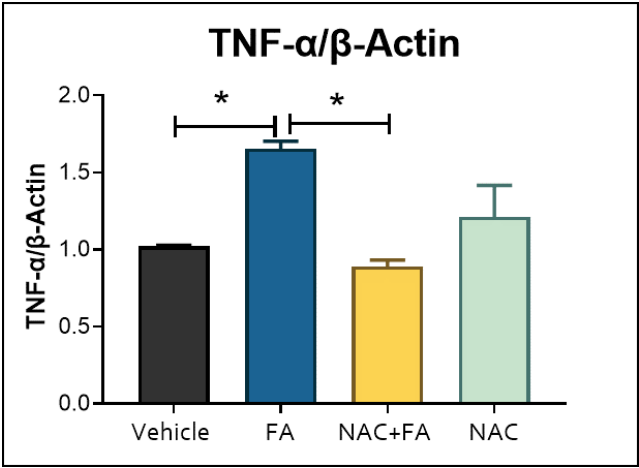

| Vehicle    | FA         | NAC+FA     | NAC        |
|------------|------------|------------|------------|
| 1.03164799 | 1.5612415  | 0.88301117 | 1.61052786 |
| 1.01988676 | 1.7154448  | 0.82209546 | 0.93107211 |
| 1.00947436 | 1.68885191 | 0.96622058 | 1.09394663 |

TNF alfa

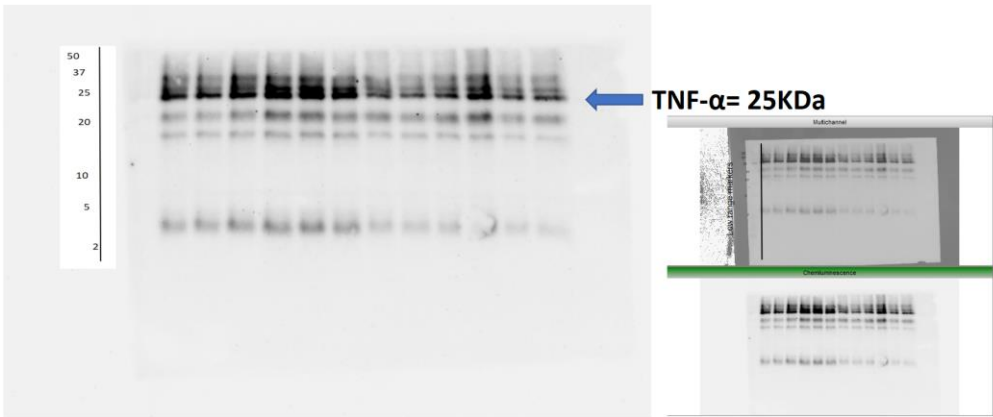

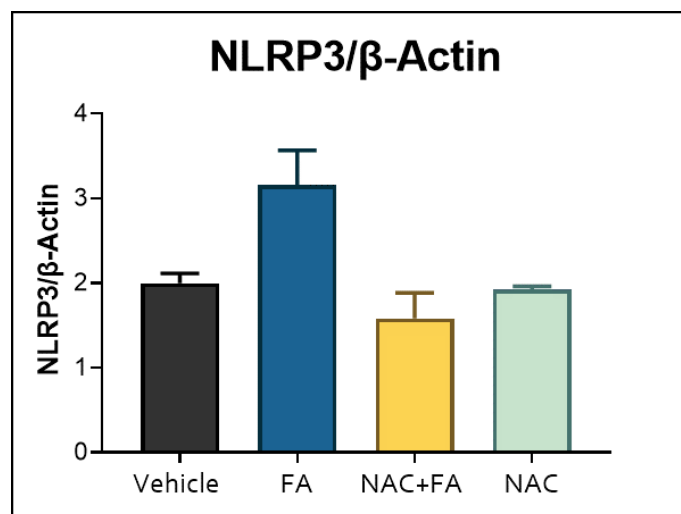

| Vehicle    | FA         | NAC+FA     | NAC        |
|------------|------------|------------|------------|
| 1.94946642 | 2.33854585 | 2.1586361  | 1.99970225 |
| 2.21920527 | 3.64537073 | 1.45860914 | 1.87062005 |
| 1.82593792 | 3.48331854 | 1.12861024 | 1.89159324 |

NLRP3

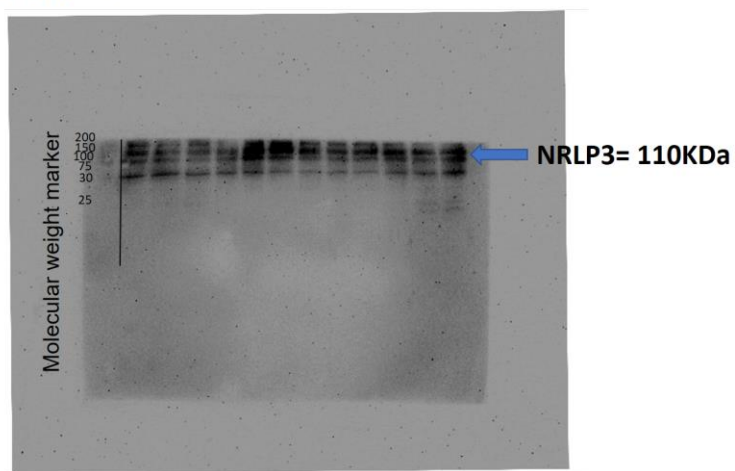

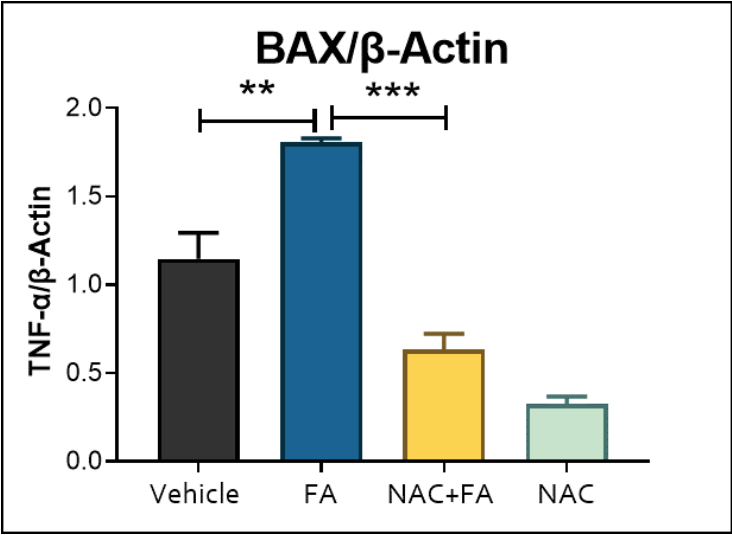

| Vehicle    | FA         | NAC+FA     | NAC        |
|------------|------------|------------|------------|
| 0.85495728 | 1.83219605 | 0.62880947 | 0.24475559 |
| 1.25033148 | 1.82616462 | 0.48028205 | 0.39058801 |
| 1.33393157 | 1.75600981 | 0.79027065 | 0.33718414 |

BAX

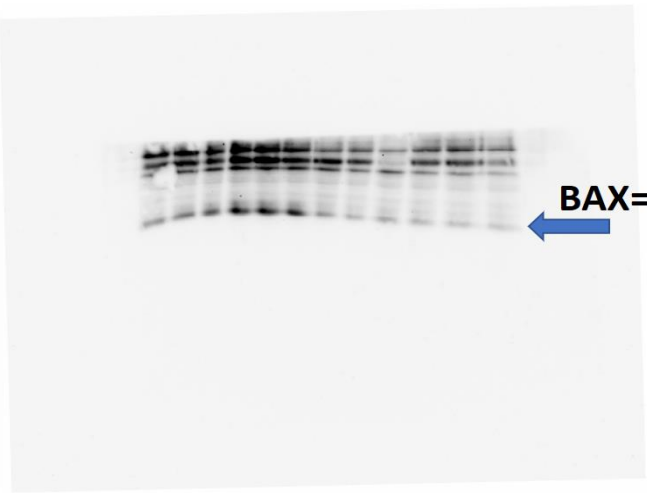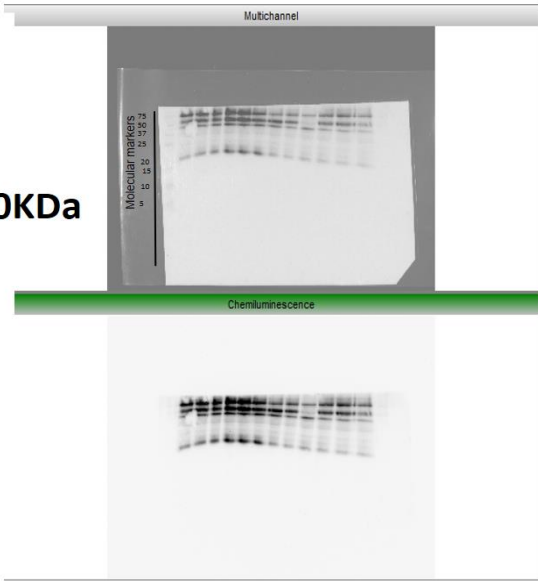

B-actin

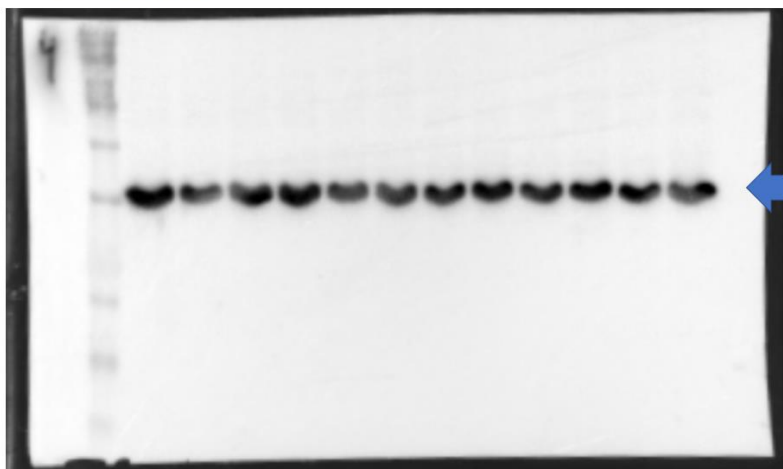

B actin= 43  
KDa

## Western blot membranes of Figure 7.

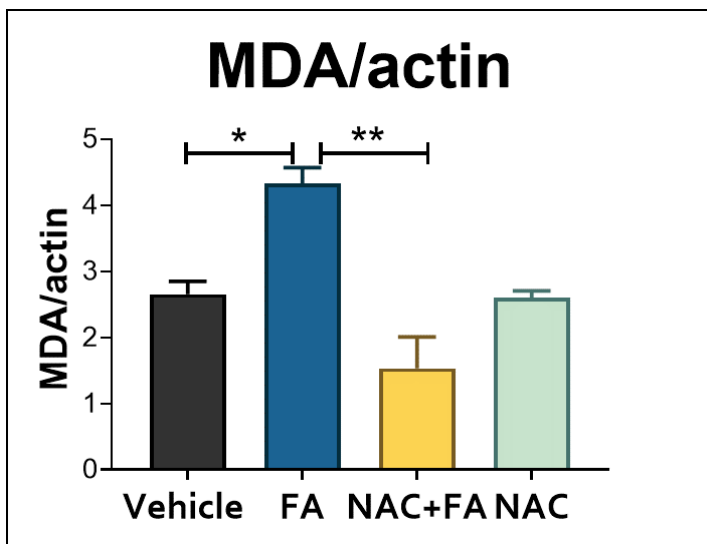

| Vehicle  | FA       | NAC+FA   | NAC      |
|----------|----------|----------|----------|
| 2.937215 | 4.026724 | 1.198199 | 2.600187 |
| 2.747233 | 4.171483 | 2.476323 | 2.779822 |
| 2.277246 | 4.799113 | 0.91936  | 2.415789 |

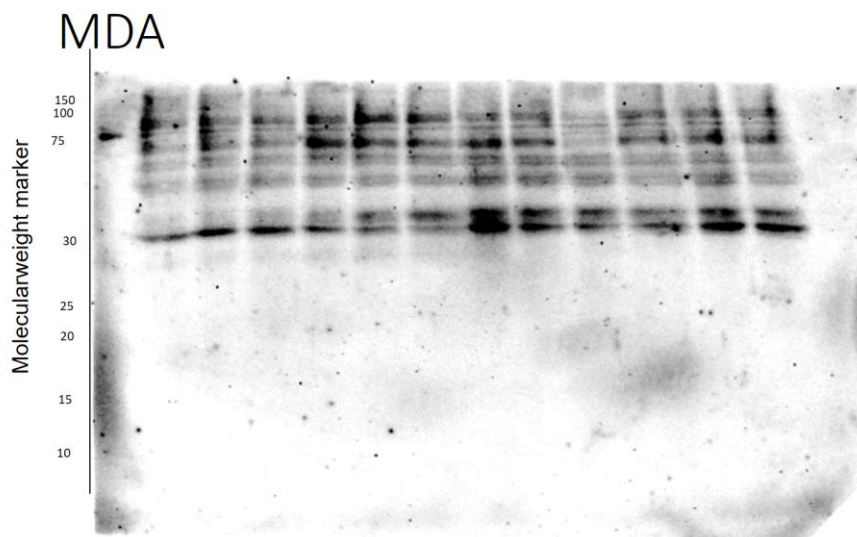

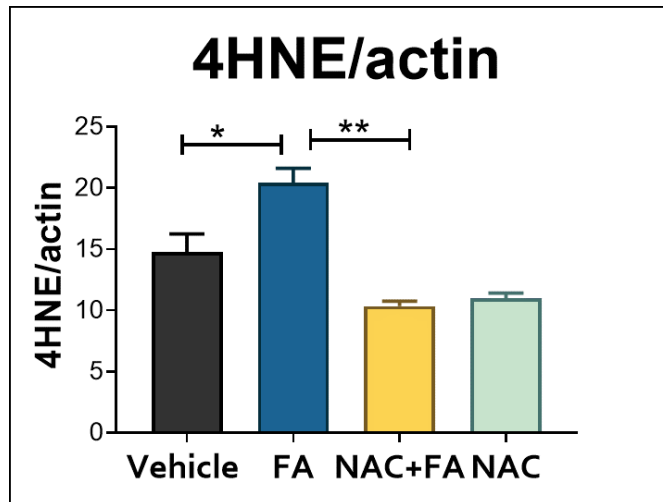

| Vehicle  | FA       | NAC+FA   | NAC      |
|----------|----------|----------|----------|
| 17.42864 | 19.09086 | 9.864676 | 10.1184  |
| 14.53852 | 19.33127 | 11.1409  | 11.26596 |
| 12.25064 | 22.79039 | 9.99134  | 11.50833 |

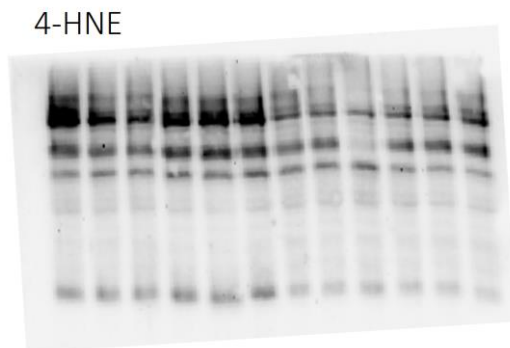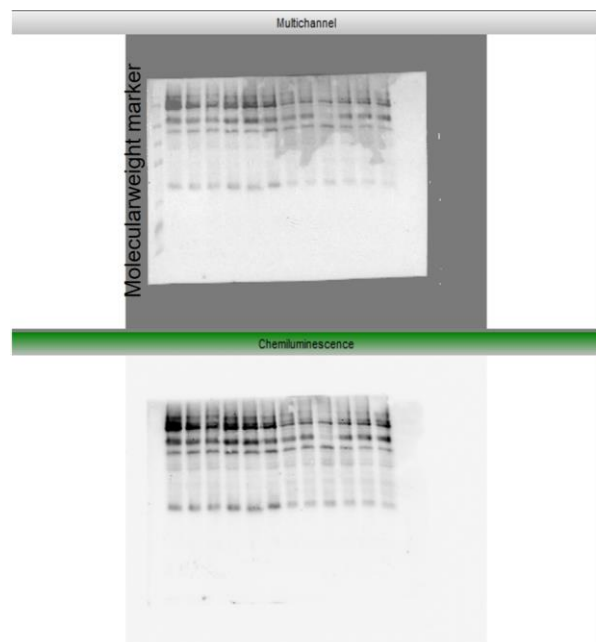

B- Actin

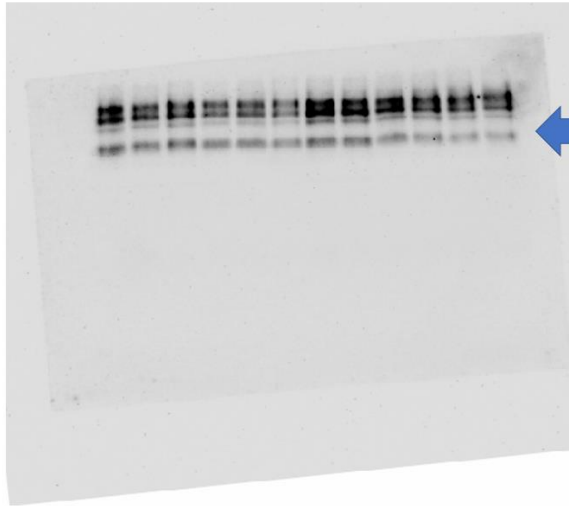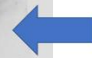

B actin= 43 KDa



## Western blot membranes of Figure 9

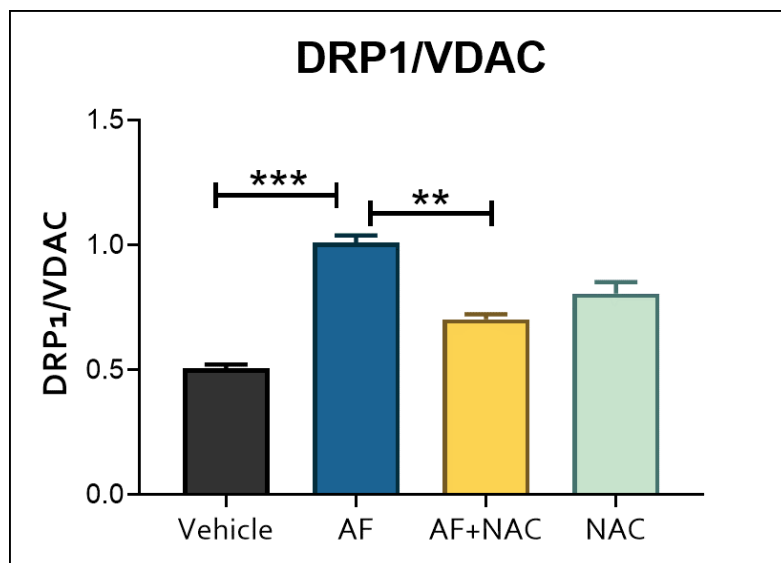

| Vehicle    | AF         | AF+NAC     | NAC        |
|------------|------------|------------|------------|
| 0.49965369 | 1.03320243 | 0.67330984 | 0.71289989 |
| 0.4847872  | 1.04291468 | 0.6927488  | 0.84842755 |
| 0.53533162 | 0.95023144 | 0.74112967 | 0.85477446 |

DRP1

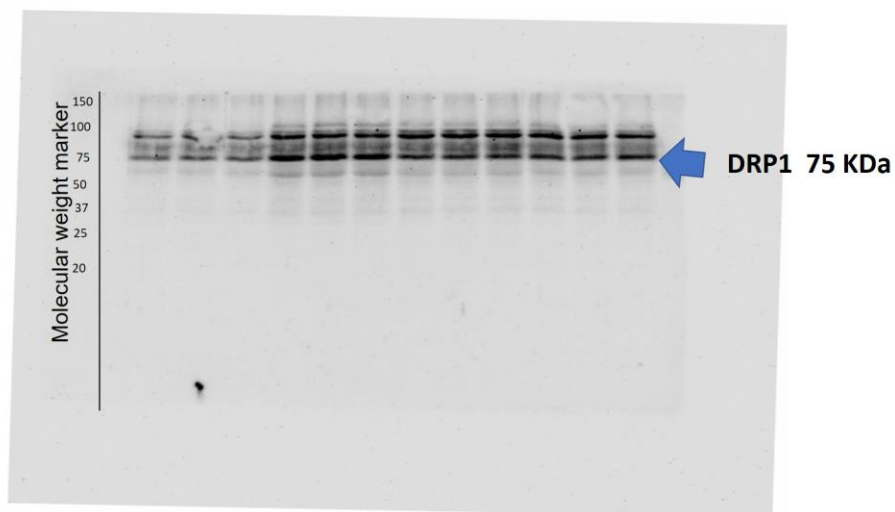

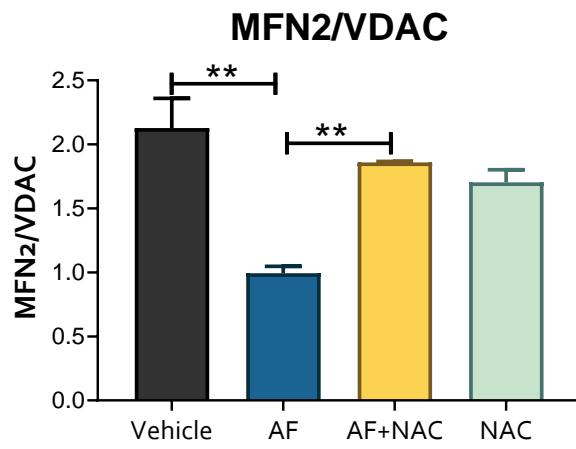

| Vehicle    | AF         | AF+NAC     | NAC        |
|------------|------------|------------|------------|
| 0.3789049  | 0.63578036 | 2.02428978 | 1.11740291 |
| 0.73219723 | 0.86560829 | 1.55301633 | 1.1770406  |
| 0.35561275 | 0.78531569 | 1.32767801 | 0.97287765 |

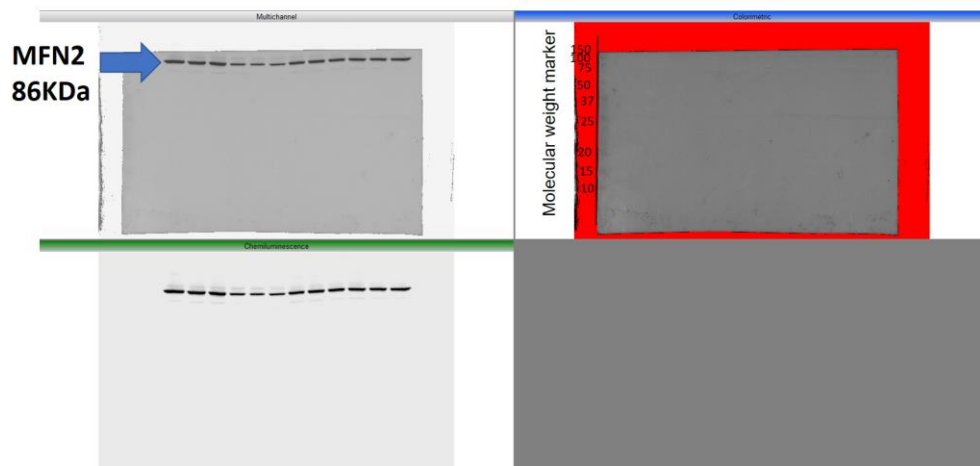

VDAC

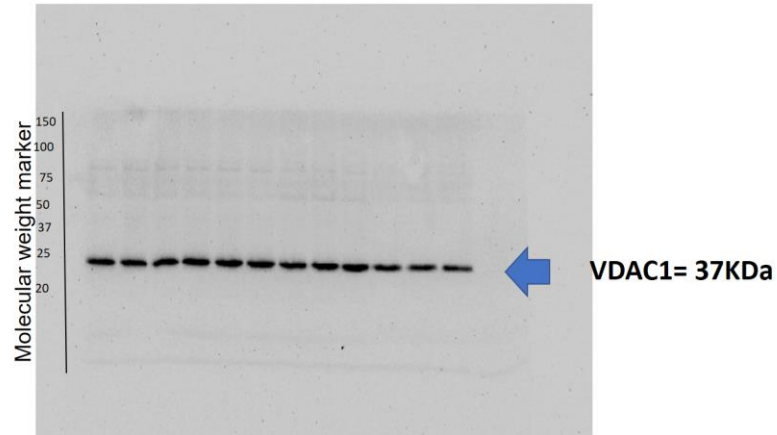

Western blot supelemntary figure 4

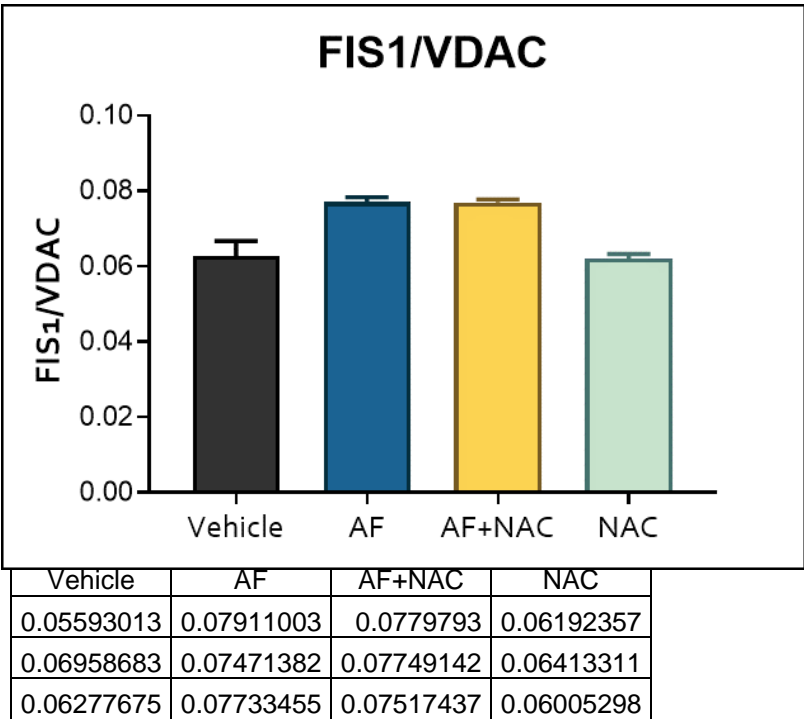

Fis1

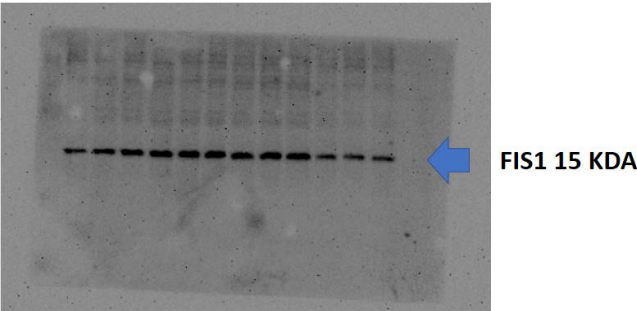

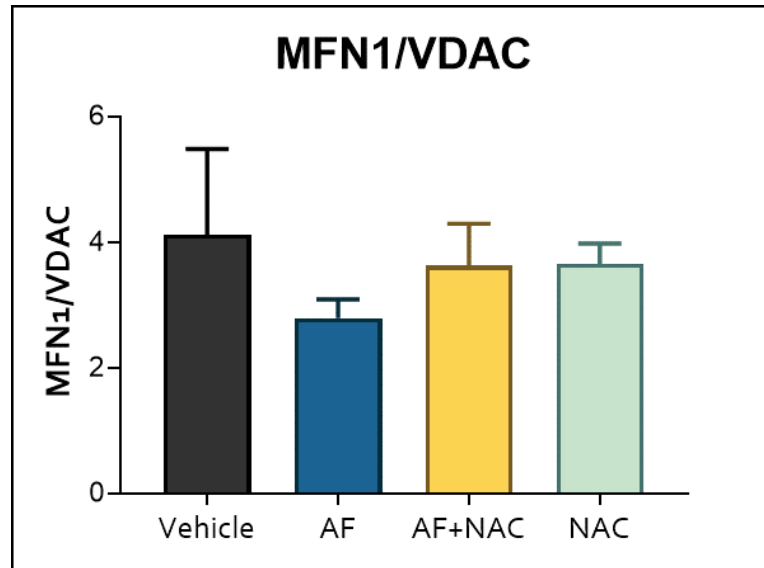

| Vehicle  | AF       | AF+NAC   | NAC      |
|----------|----------|----------|----------|
| 6.796167 | 2.584477 | 2.980436 | 3.477387 |
| 2.316114 | 3.382156 | 4.959867 | 4.28662  |
| 3.238759 | 2.405699 | 2.940465 | 3.189984 |

MFN1

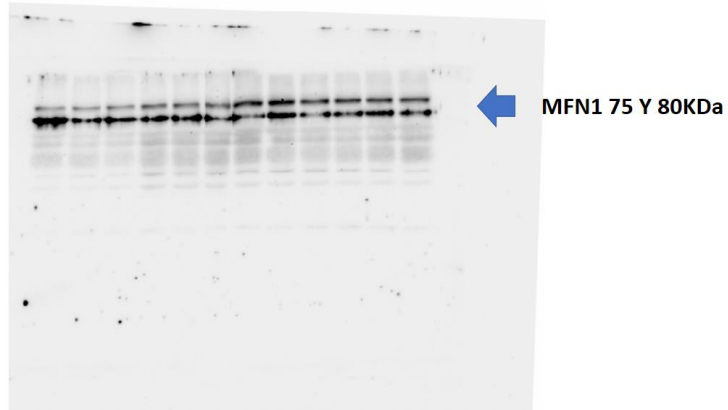

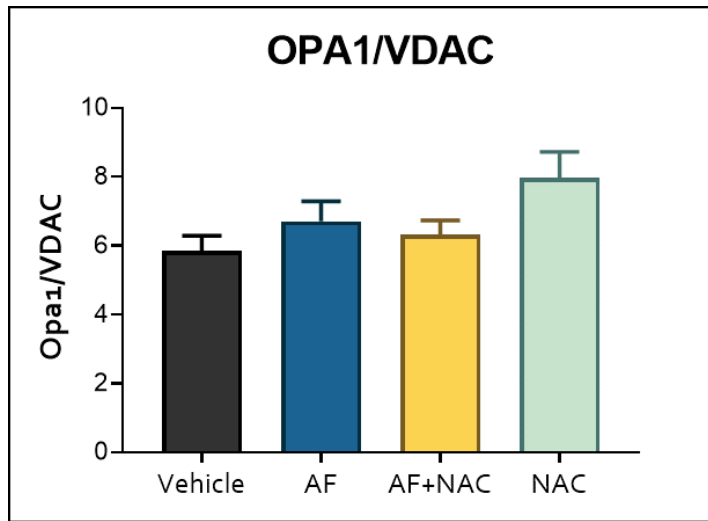

| Vehicle  | AF       | AF+NAC   | NAC      |
|----------|----------|----------|----------|
| 5.283835 | 7.672334 | 5.570879 | 9.045065 |
| 5.479125 | 5.660518 | 7.038251 | 8.334301 |
| 6.735062 | 6.776542 | 6.319103 | 6.484178 |

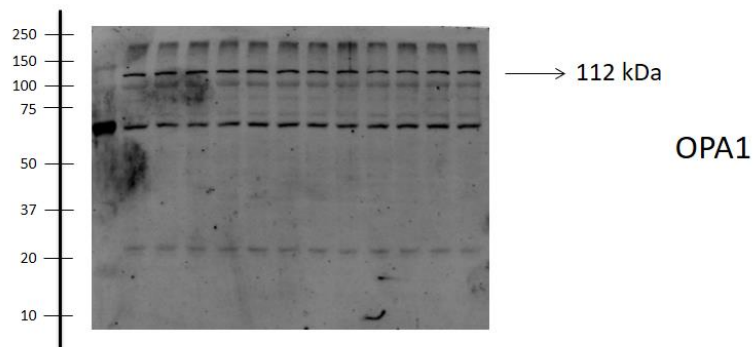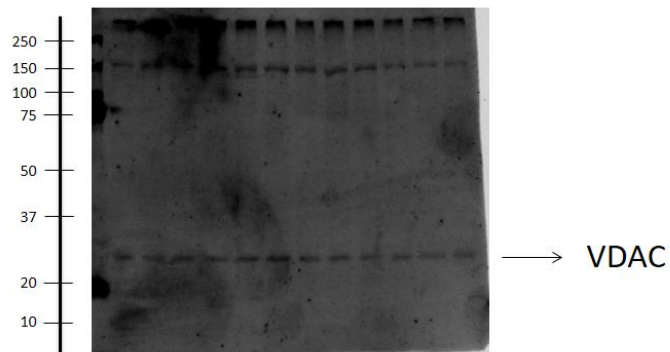

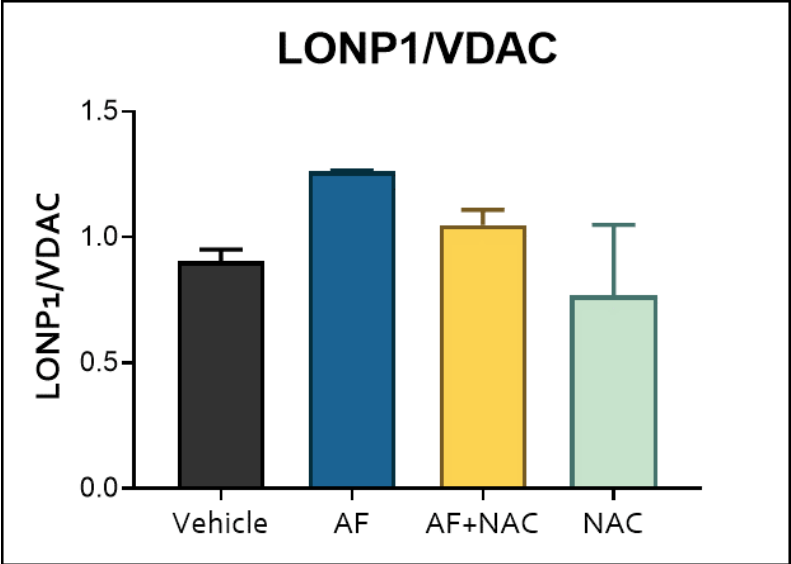

| Vehicle    | AF         | AF+NAC     | NAC        |
|------------|------------|------------|------------|
| 0.80842402 | 1.26166443 | 0.99053442 | 0.97640648 |
| 0.94509542 | 1.25733501 | 1.16898178 | 1.11613914 |
| 0.9550785  | 1.26730732 | 0.98437941 | 0.20708973 |

LONP

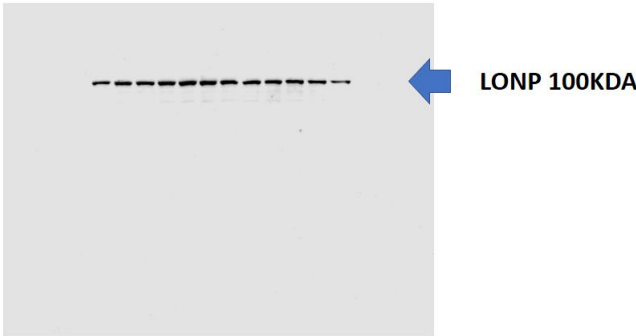

Western blot membranes of Figure 11.

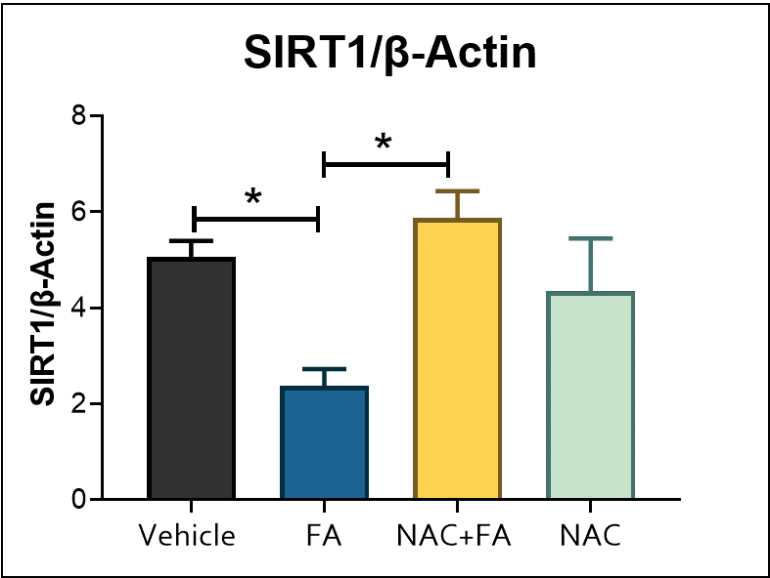

| Vehicle    | FA         | NAC+FA     | NAC        |
|------------|------------|------------|------------|
| 5.52415512 | 3.03380195 | 5.46337493 | 5.76550045 |
| 5.24777932 | 2.26876459 | 6.973627   | 2.16927752 |
| 4.41229537 | 1.82952411 | 5.18604555 | 5.08827623 |

SIRT1

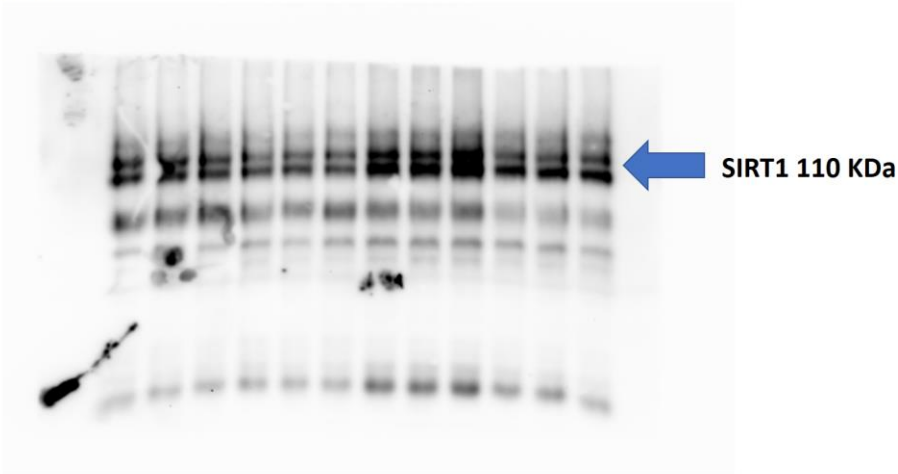



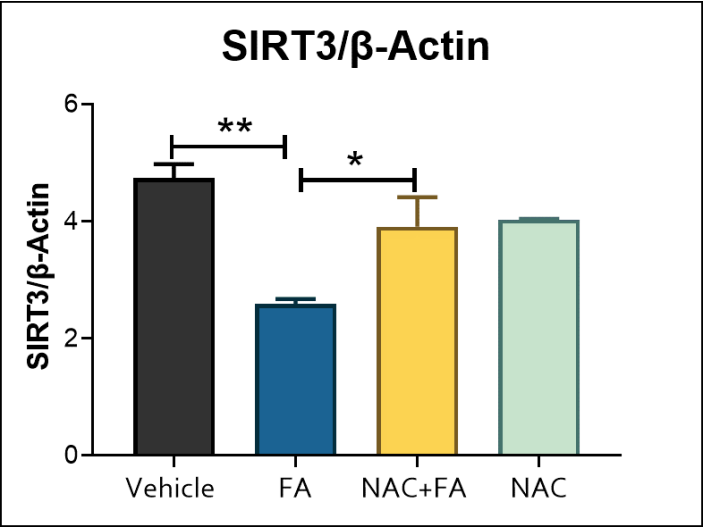

| Vehicle    | FA         | NAC+FA     | NAC        |
|------------|------------|------------|------------|
| 5.21209779 | 2.68983826 | 3.88457935 | 4.03808888 |
| 4.47368897 | 2.65913419 | 3.04511235 | 4.01417205 |
| 4.52635123 | 2.41276779 | 4.79260803 | 4.04564588 |

Sirt3

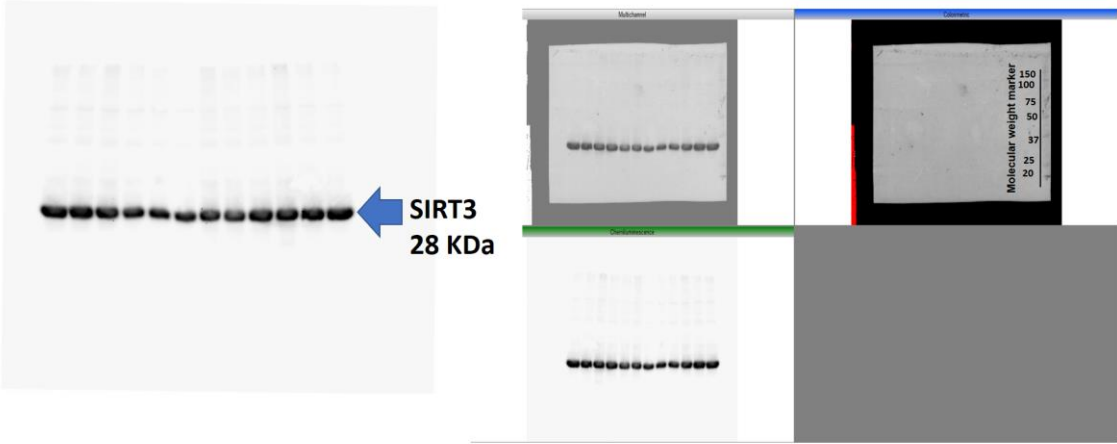

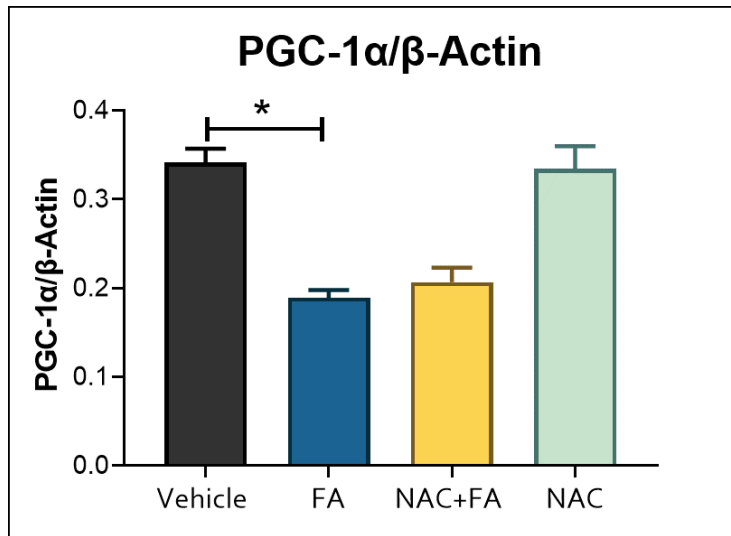

| Vehicle    | FA         | NAC+FA     | NAC        |
|------------|------------|------------|------------|
| 0.30963461 | 0.18414456 | 0.20347402 | 0.3849452  |
| 0.35657256 | 0.17763982 | 0.23651442 | 0.30199329 |
| 0.35713431 | 0.20608746 | 0.18041365 | 0.31545666 |

PGC-1 $\alpha$

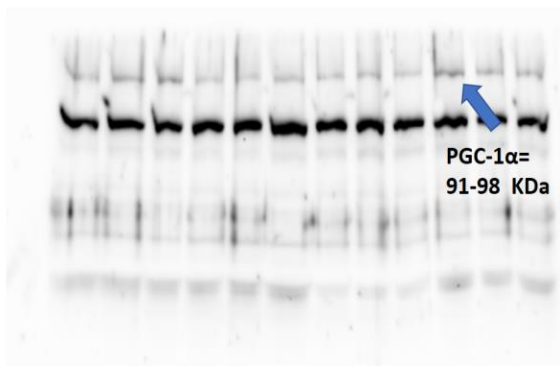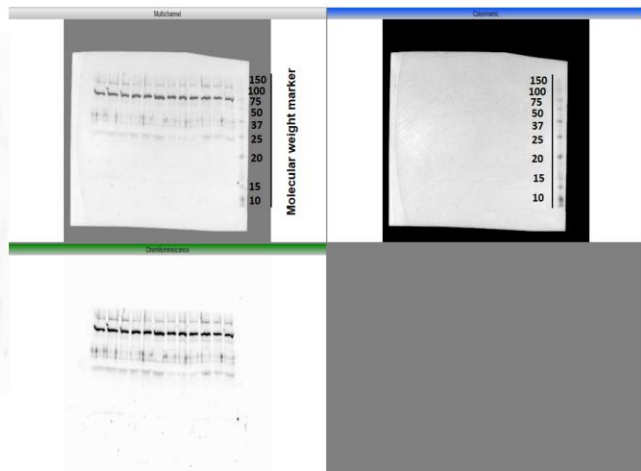

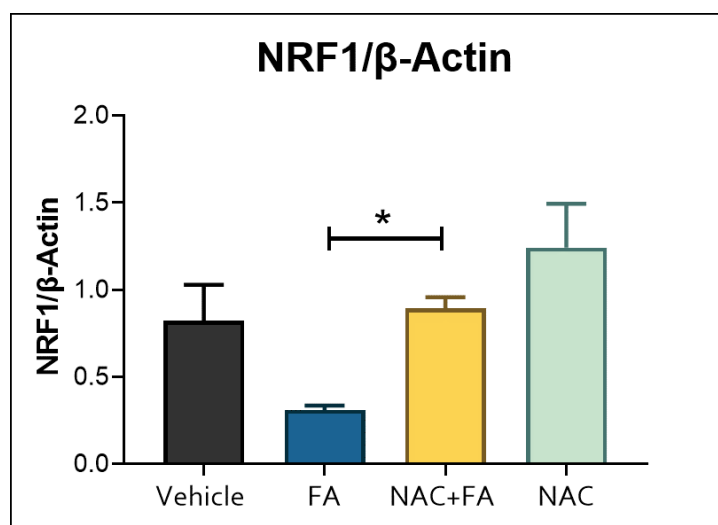

| Vehicle    | FA         | NAC+FA     | NAC        |
|------------|------------|------------|------------|
| 1.23415707 | 0.32171404 | 0.99463225 | 0.82935667 |
| 0.57739134 | 0.26279176 | 0.77704334 | 1.69827541 |
| 0.65307219 | 0.34810109 | 0.90904736 | 1.19751918 |

NRF1

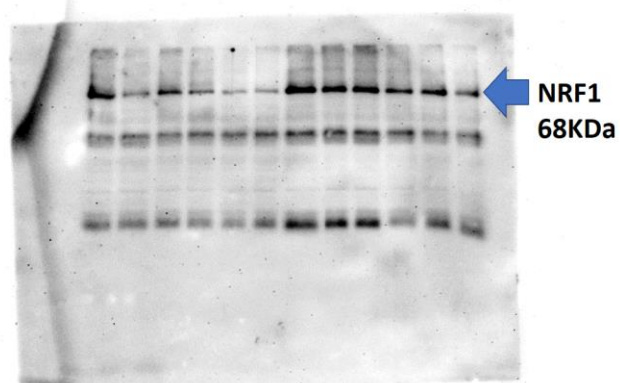

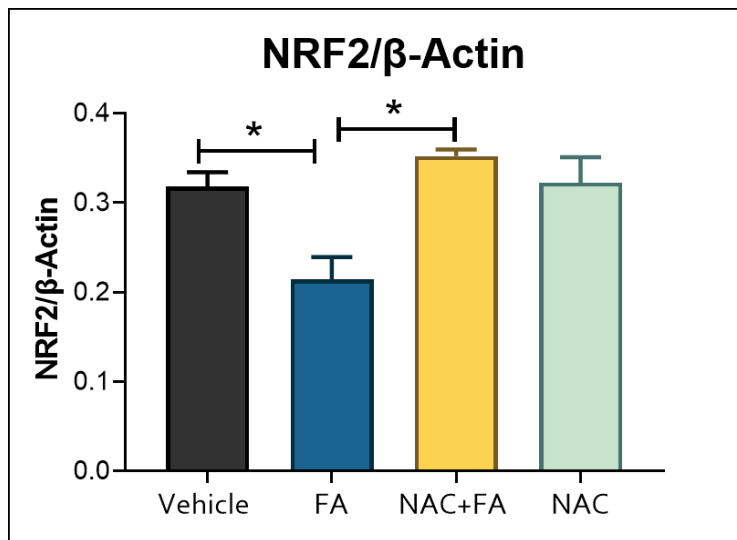

| Vehicle  | FA       | NAC+FA   | NAC      |
|----------|----------|----------|----------|
| 0.345182 | 0.235862 | 0.362289 | 0.322044 |
| 0.318965 | 0.242411 | 0.356112 | 0.273214 |
| 0.290114 | 0.164457 | 0.33754  | 0.372021 |

NRF2

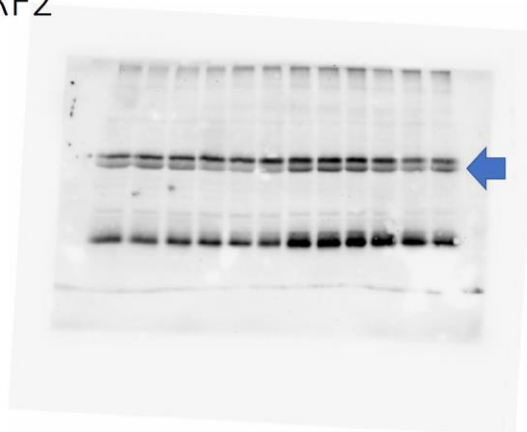

NRF2 o GABP- $\beta$ 1/2 = 43 KDa

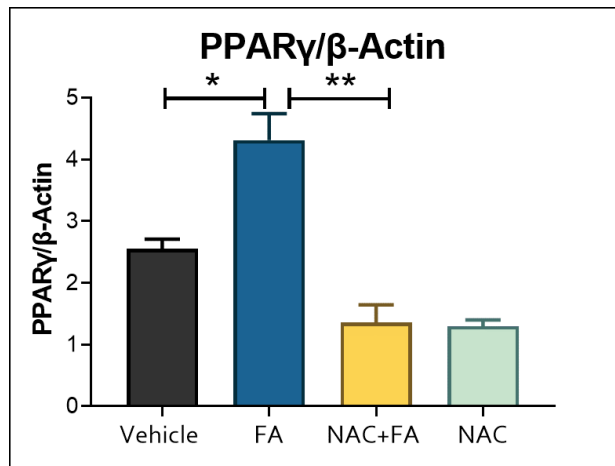

| Vehicle    | FA         | NAC+FA     | NAC        |
|------------|------------|------------|------------|
| 2.23351941 | 4.88662656 | 0.91516011 | 1.47518327 |
| 2.69654108 | 4.57561357 | 1.24968928 | 1.29423187 |
| 2.71883719 | 3.47627225 | 1.90003155 | 1.12690707 |

PPAR gamma

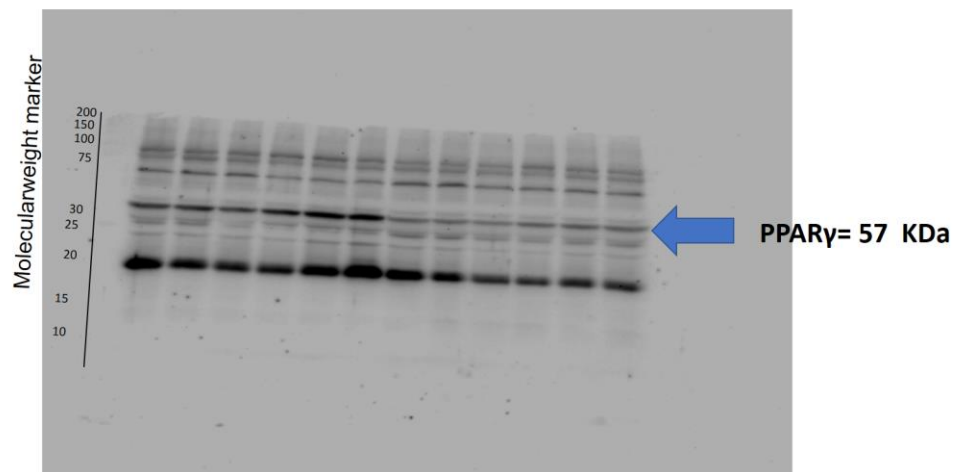

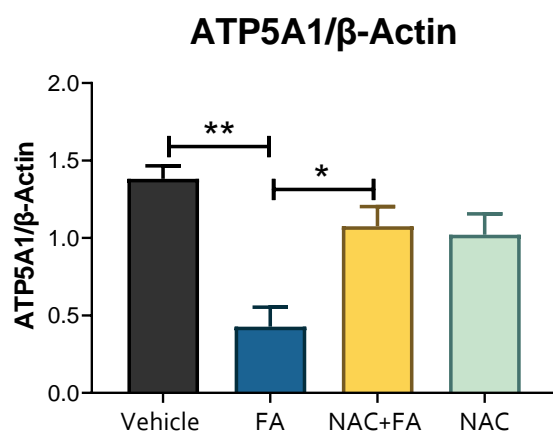

| Vehicle  | FA       | NAC+FA   | NAC      |
|----------|----------|----------|----------|
| 1.359236 | 0.333929 | 1.329114 | 1.131876 |
| 1.246283 | 0.274222 | 0.970024 | 1.17835  |
| 1.53816  | 0.675813 | 0.929425 | 0.751162 |

ATP5a

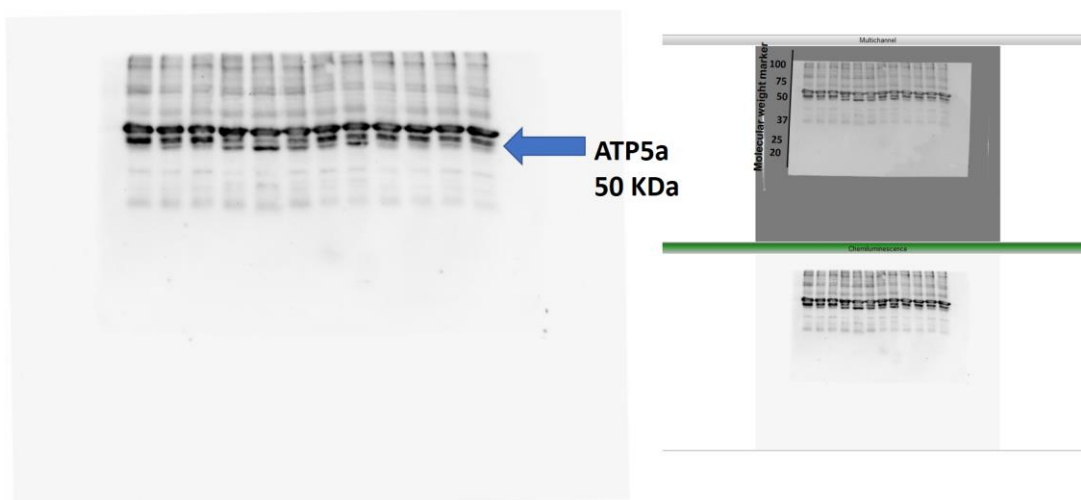

## CPT1/ $\beta$ -Actin

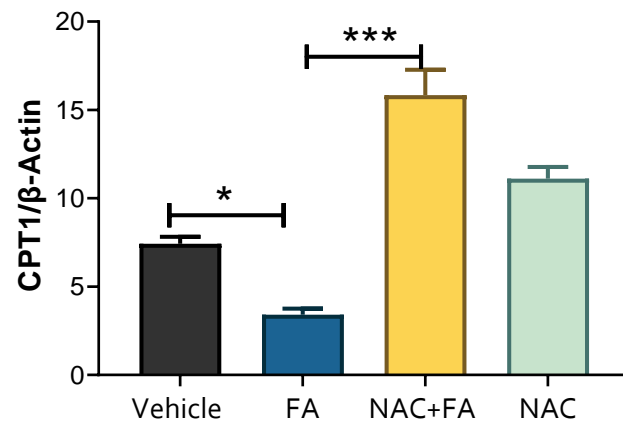

| Vehicle  | FA       | NAC+FA   | NAC      |
|----------|----------|----------|----------|
| 7.006263 | 2.922048 | 13.23143 | 10.36047 |
| 8.222851 | 4.066357 | 18.14552 | 12.42093 |
| 7.035095 | 3.233778 | 16.14807 | 10.57153 |

## CPT-1 $\alpha$

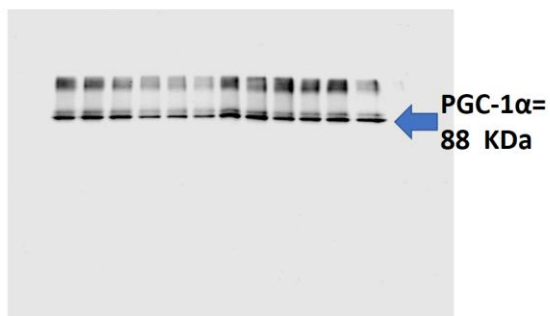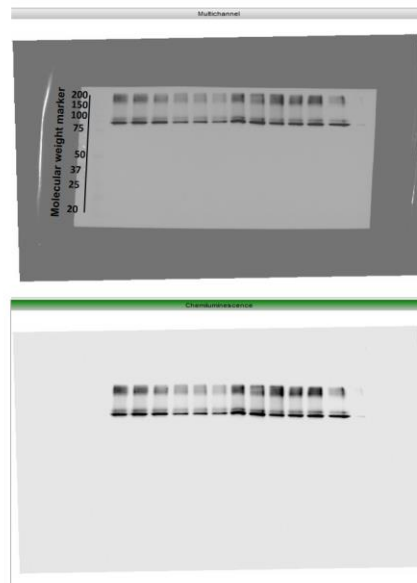

## VDAC/ $\beta$ -Actin

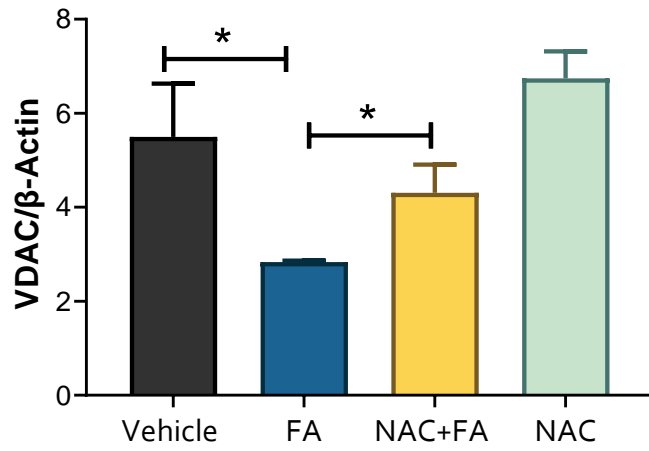

| Vehicle    | FA         | NAC+FA     | NAC        |
|------------|------------|------------|------------|
| 7.76972752 | 2.87445045 | 3.96595681 | 5.63988016 |
| 4.38507927 | 2.77525568 | 3.47869177 | 7.00790834 |
| 4.3299294  | 2.85065469 | 5.47437846 | 7.57698683 |

## VDAC

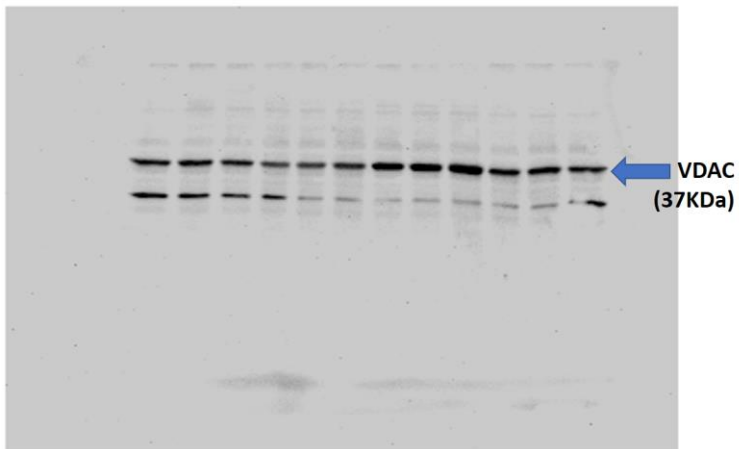



**$\beta$ -Actin**

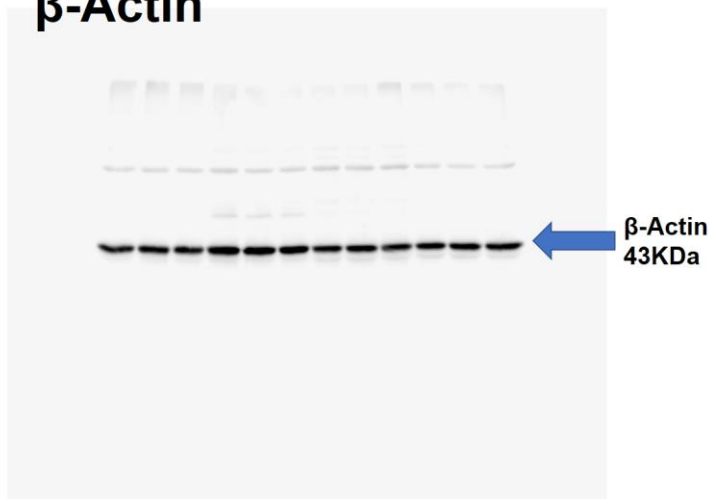

Western blot membranes of Figure 12.

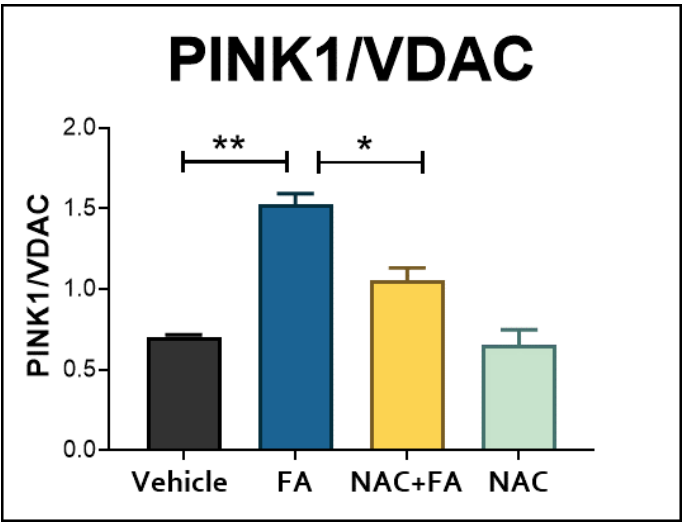

| Vehicle  | FA       | NAC+FA     | NAC      |
|----------|----------|------------|----------|
| 0.682705 | 1.467966 | 1.076935   | 0.842651 |
| 0.723144 | 1.65801  | 0.915936   | 0.539535 |
| 0.708236 | 1.459375 | 1.17498474 | 0.571308 |

**PINK**

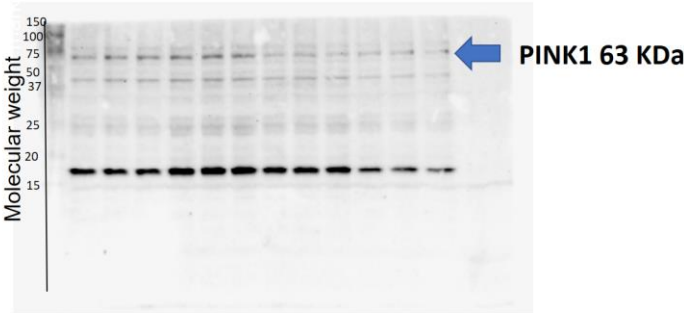

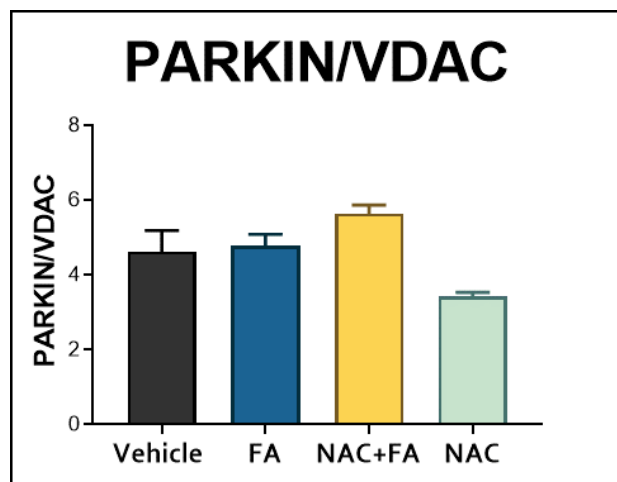

| Vehicle  | FA       | NAC+FA   | NAC      |
|----------|----------|----------|----------|
| 3.607509 | 4.479805 | 5.765629 | 3.449712 |
| 5.558215 | 4.460144 | 5.191758 | 3.589188 |
| 4.681846 | 5.382733 | 5.944185 | 3.209564 |

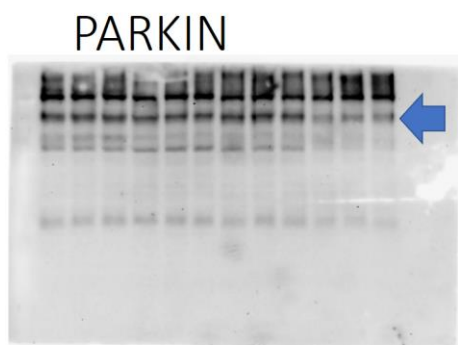

57 PARKIN

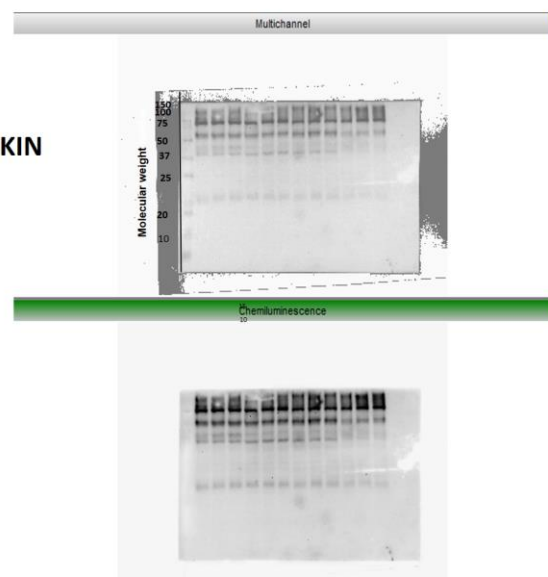

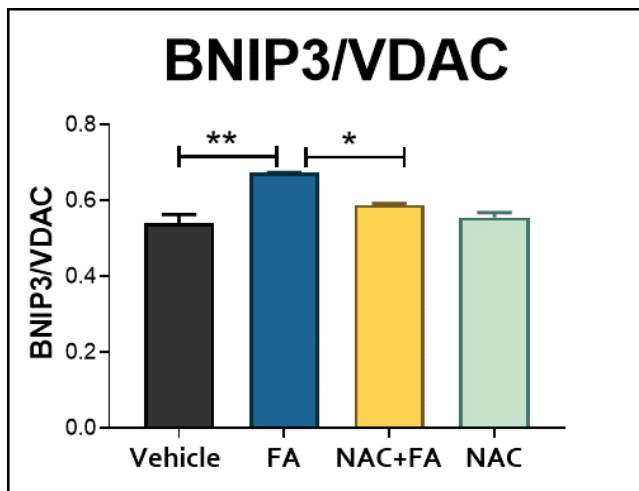

| Vehicle    | FA         | NAC+FA     | NAC        |
|------------|------------|------------|------------|
| 0.58681384 | 0.67337381 | 0.58102964 | 0.57398213 |
| 0.52409407 | 0.67200514 | 0.59390857 | 0.53203779 |
| 0.50873734 | 0.67461331 | 0.59162463 | 0.56174891 |

## BNIP3

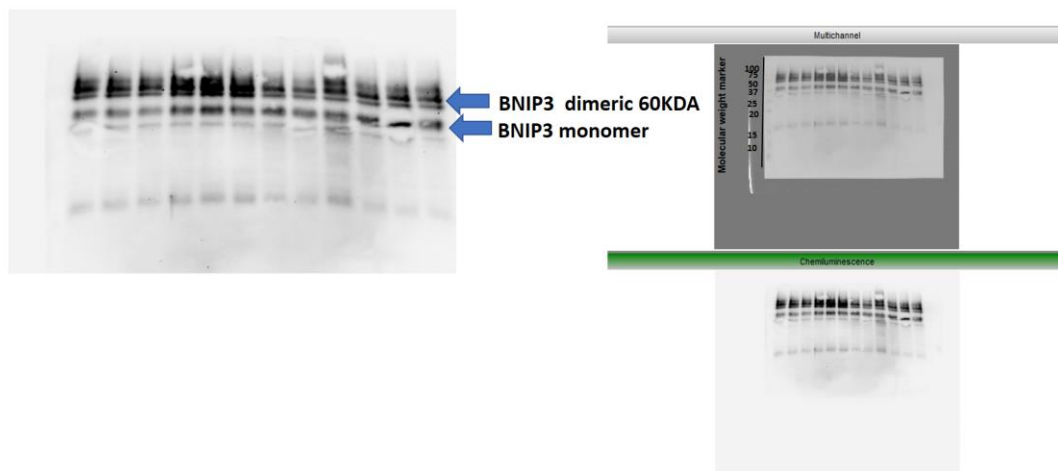

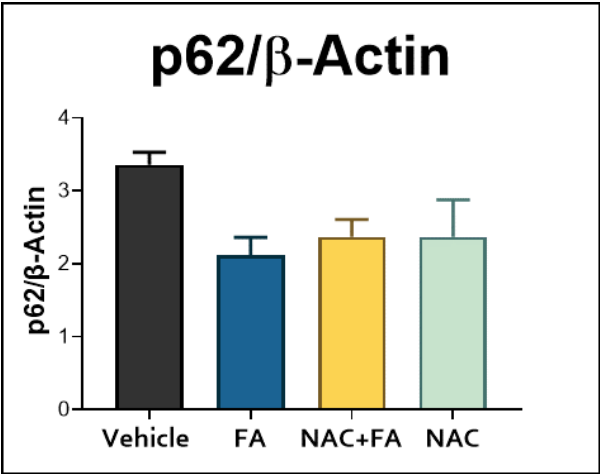

| Vehicle    | FA         | NAC+FA   | NAC        |
|------------|------------|----------|------------|
| 3.617965   | 2.14913844 | 1.998233 | 1.90859241 |
| 3.418165   | 2.52571216 | 2.286647 | 3.38054665 |
| 3.03584923 | 1.68650581 | 2.813905 | 1.81502106 |

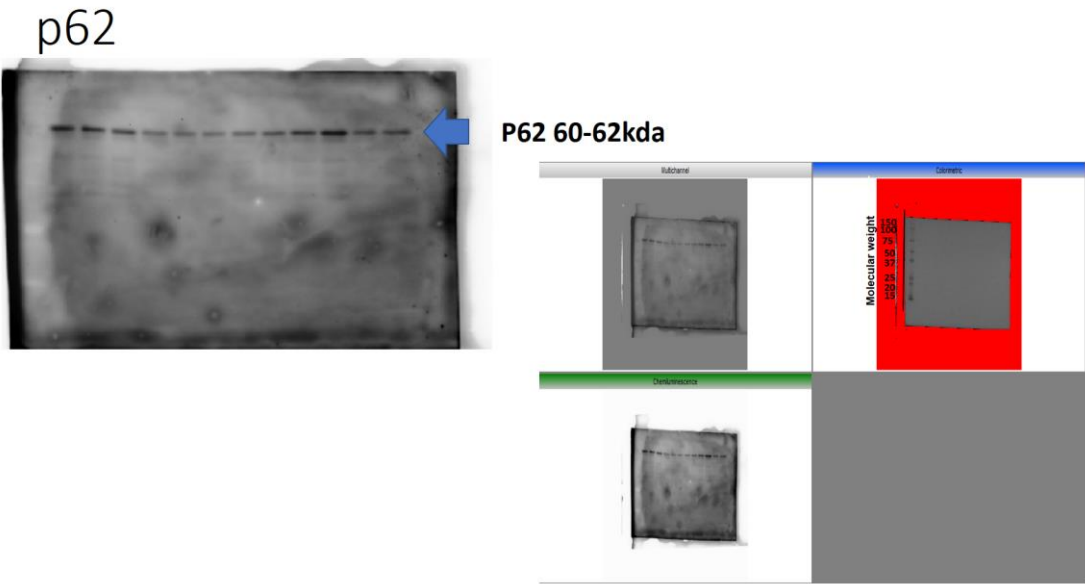

## VDAC mitochondrial fraction

VDAC

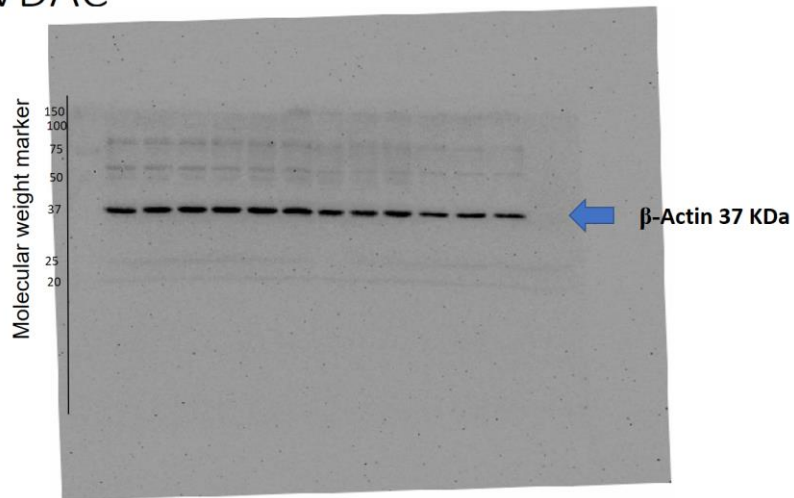

## $\beta$ -actin heart homogenate

$\beta$ -Actin

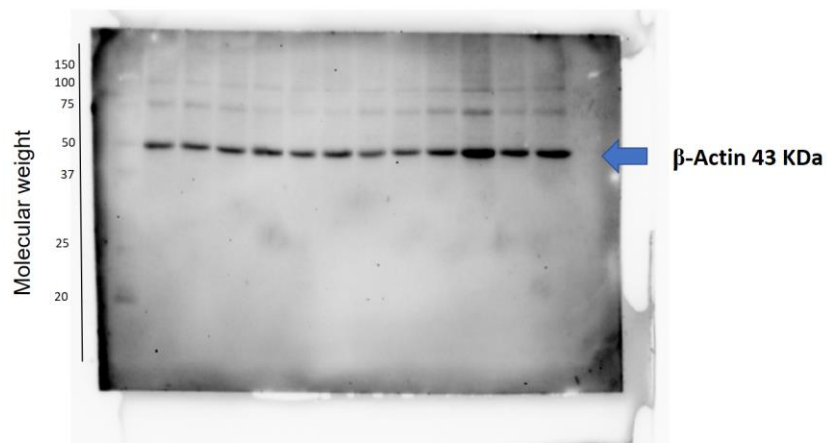

Supplement: s1 [file s1]
